# Supplementary material
Source: PubMed Central journal article supplement (PMC3075292)

# Supplemental Figure 5A

I.

Drivers 82 Hz ( $0.06 \text{ nA}^2$ ), Neighbors  $0.08 \text{ nA}^2$

104 Hz ( $0.08 \text{ nA}^2$ ),  $0.15 \text{ nA}^2$

144 Hz ( $0.186 \text{ nA}^2$ ),  $0.008 \text{ nA}^2$

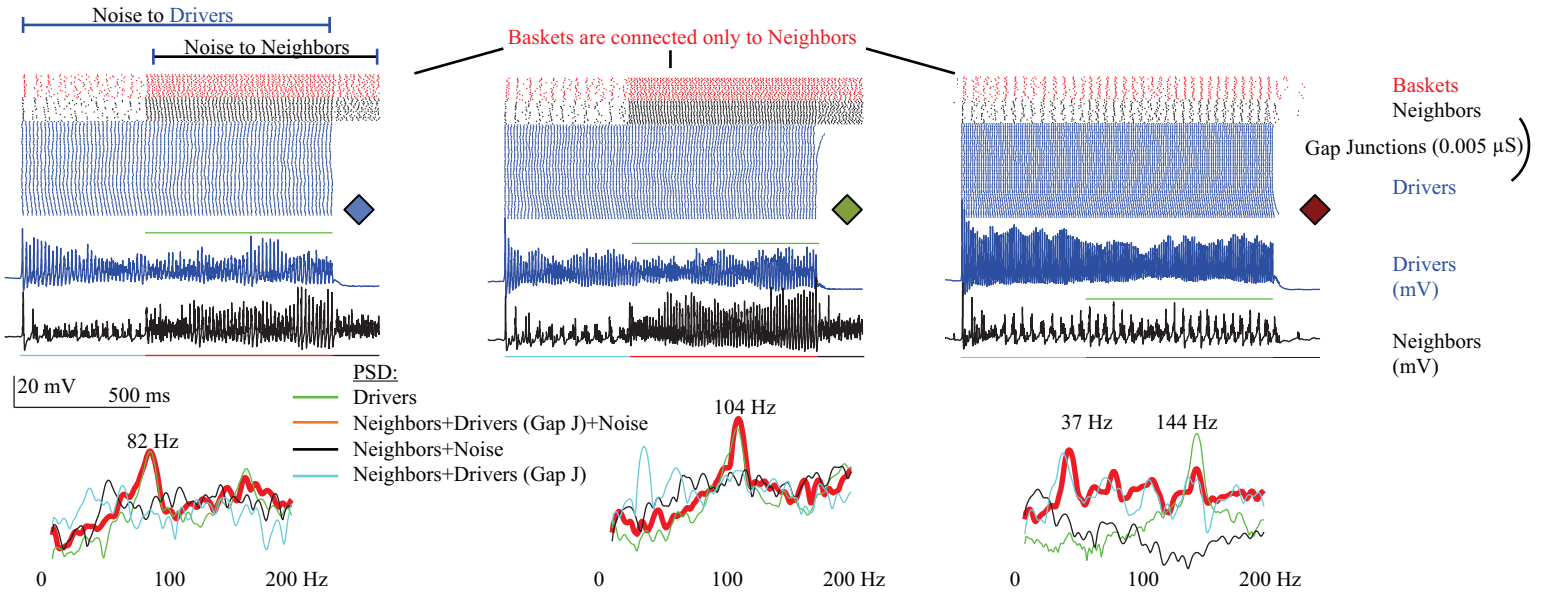

II.

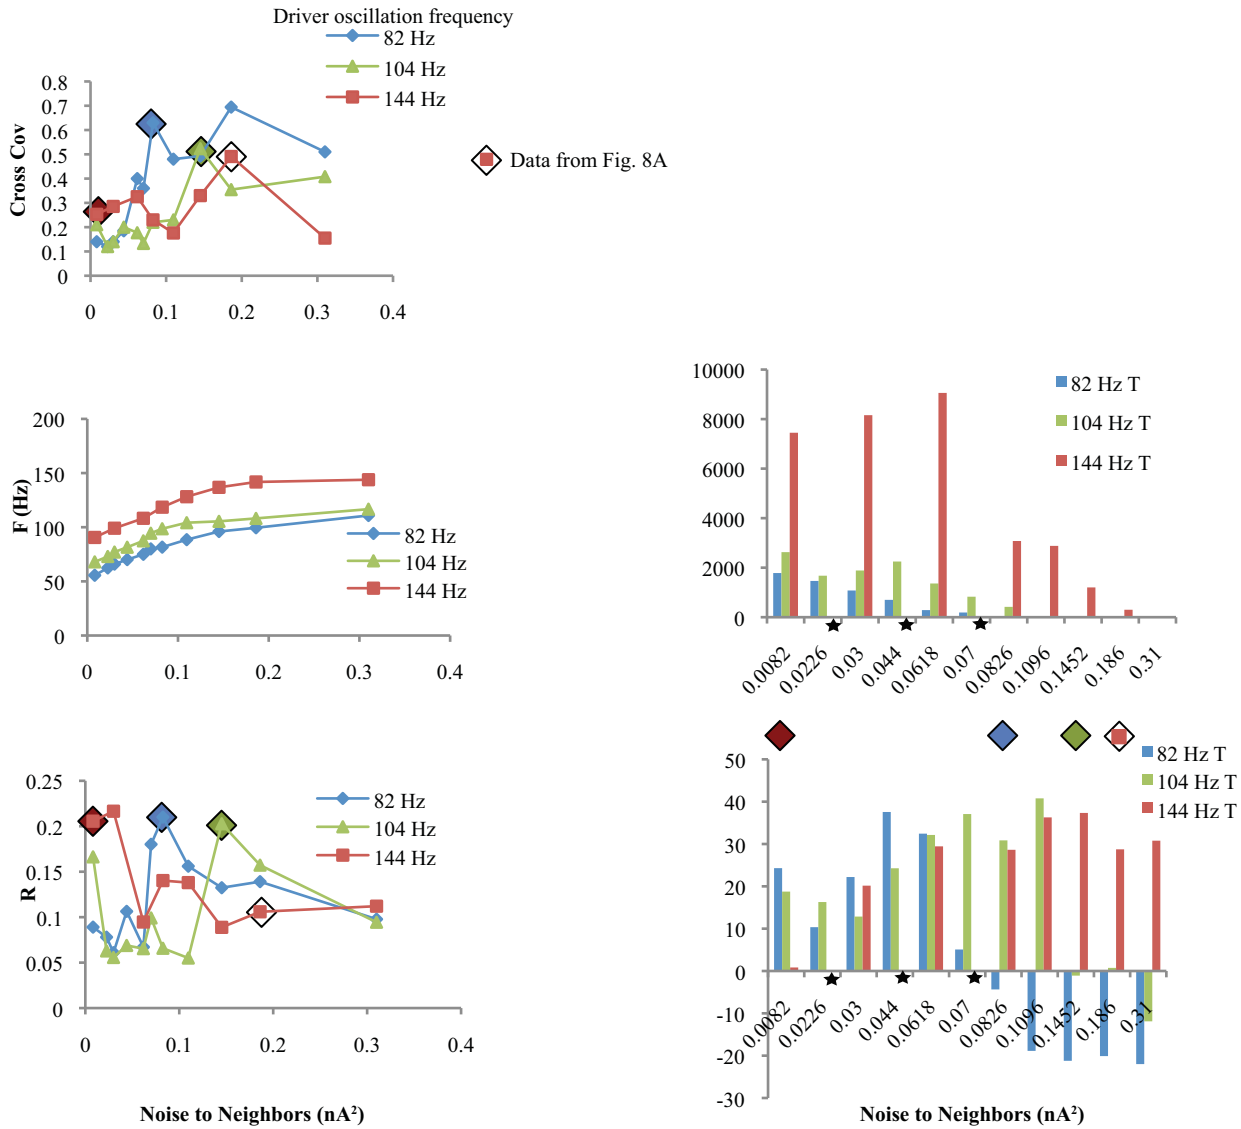

Supplement: supp_00643.2010_figS5a.pdf [file supp_00643.2010_figS5a.pdf]
