# Supplementary material
Source: PubMed Central journal article supplement (PMC3075292)

# Supplemental Figure 1

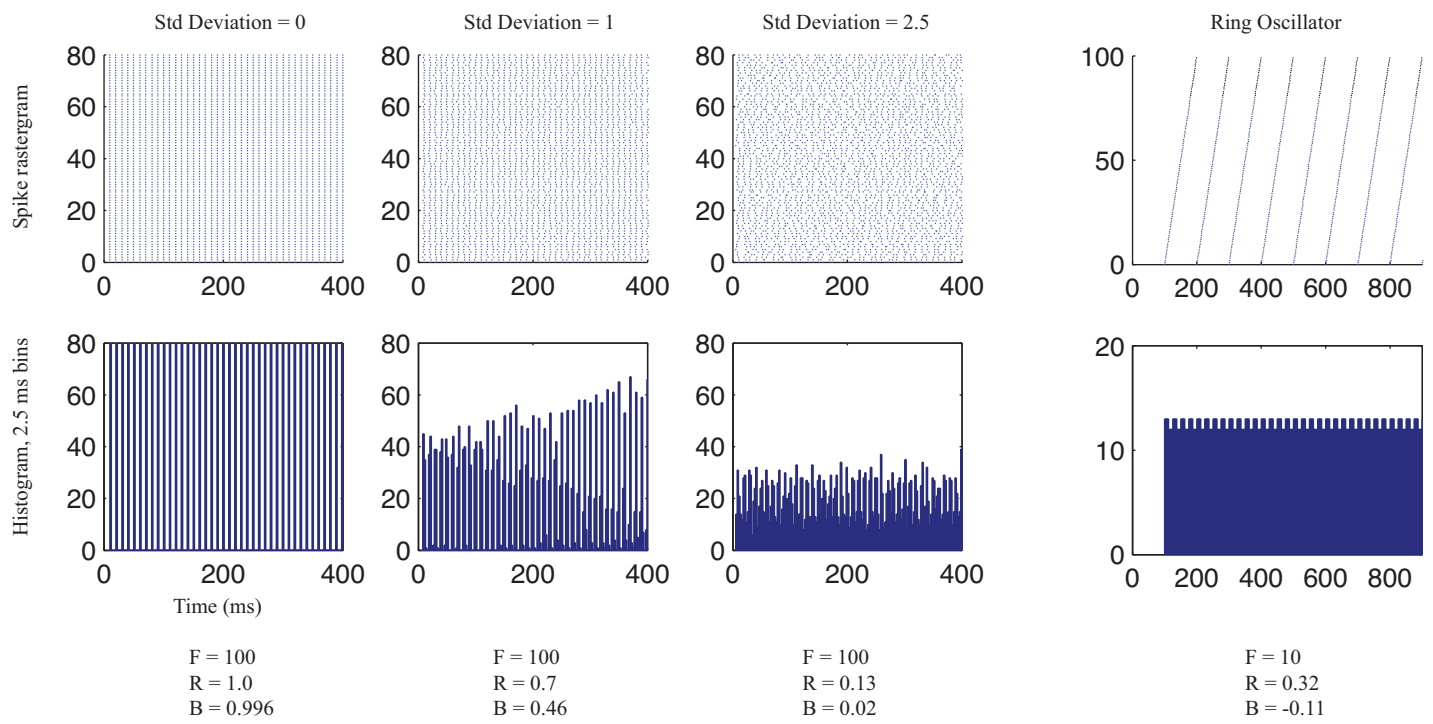

Supplement: supp_00643.2010_figS1.pdf [file supp_00643.2010_figS1.pdf]

# A Supplemental Figure 2

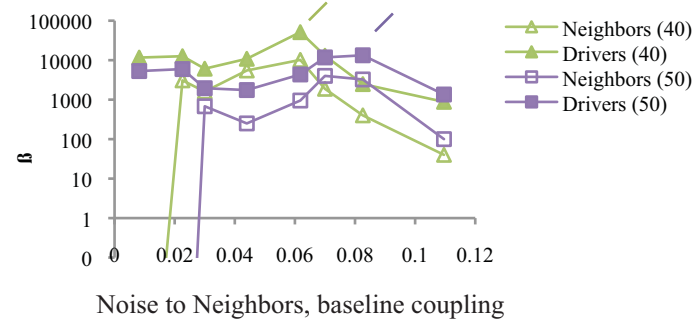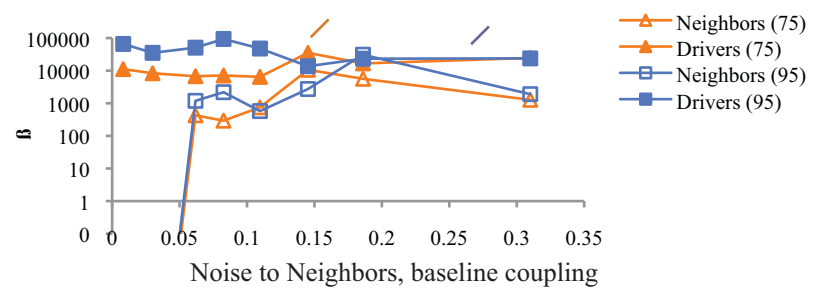

# B

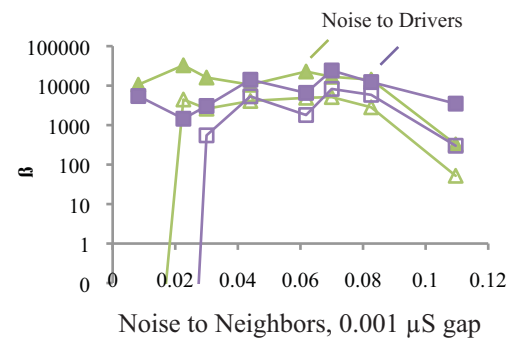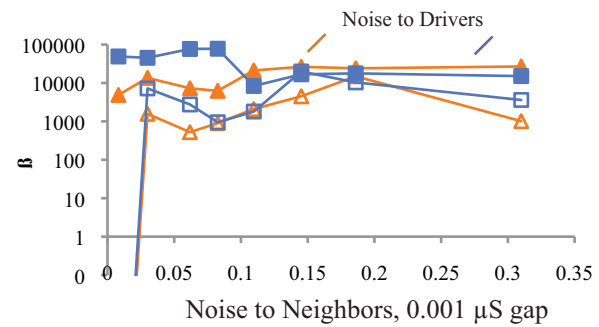

# C

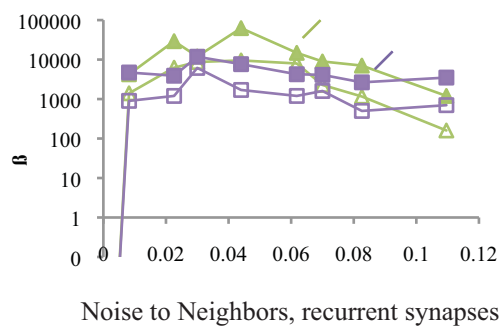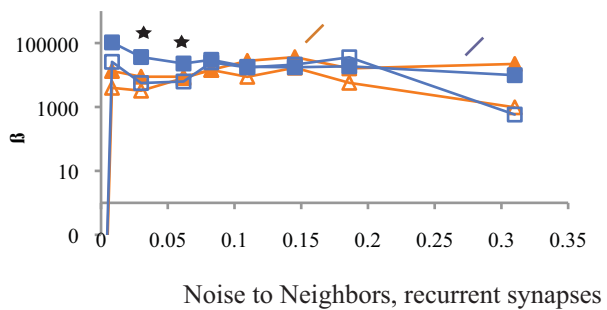

Supplement: supp_00643.2010_figS2.pdf [file supp_00643.2010_figS2.pdf]

# Supplemental Figure 3

A

Drivers 95 Hz, Neighbors 0.0826 nA<sup>2</sup>

95 Hz, 0.1096 nA<sup>2</sup>

95 Hz, 0.186 nA<sup>2</sup>

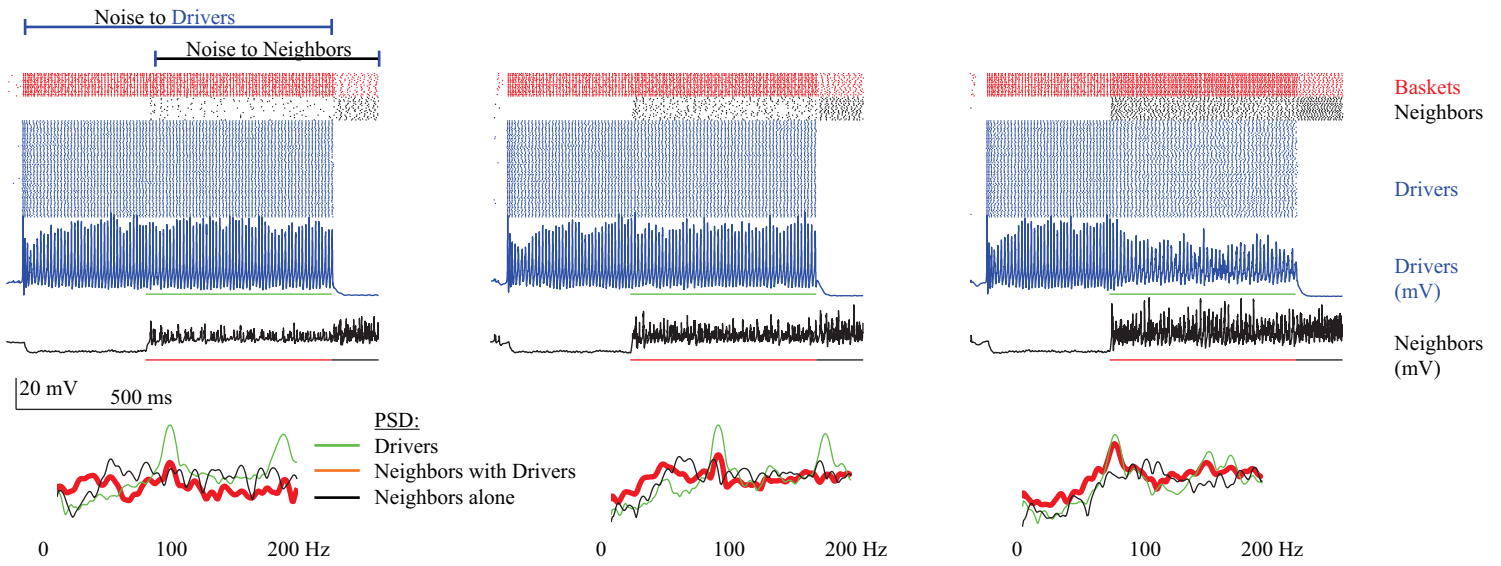

B

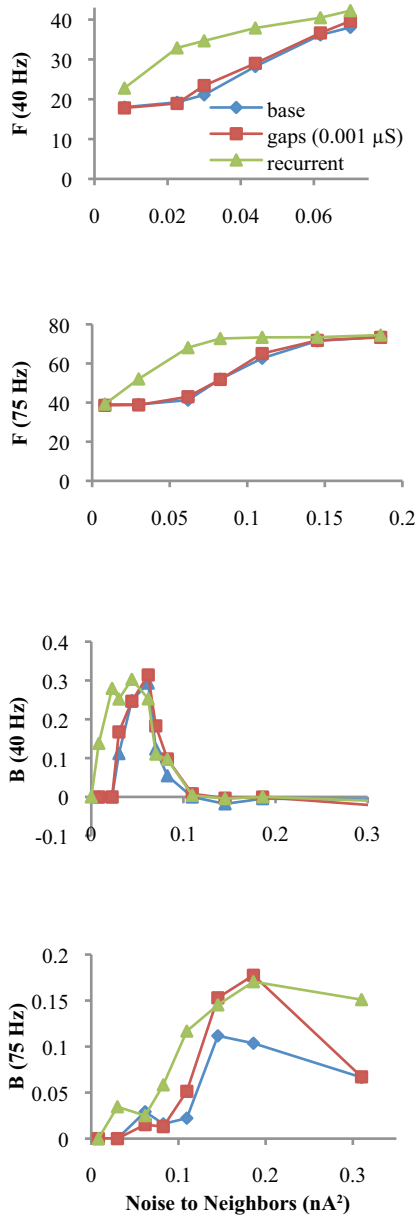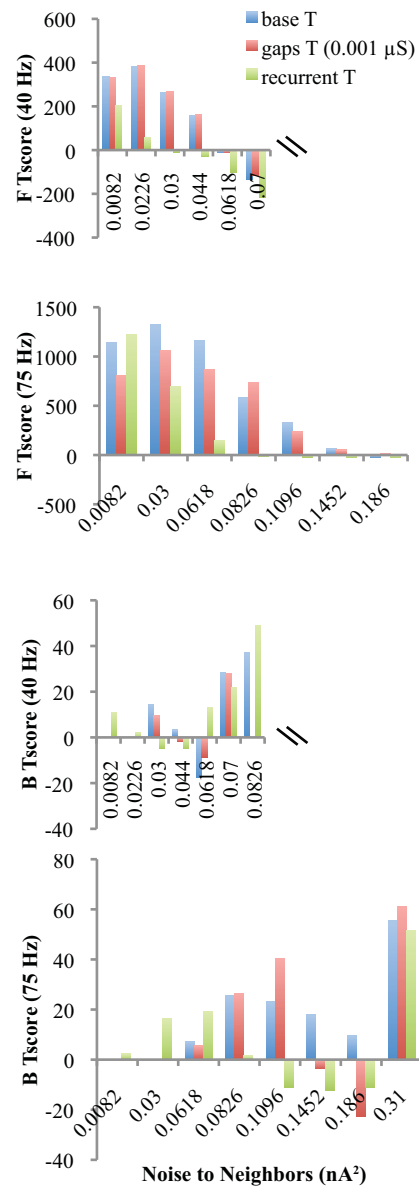

Supplement: supp_00643.2010_figS3.pdf [file supp_00643.2010_figS3.pdf]

A Supplemental Figure 4

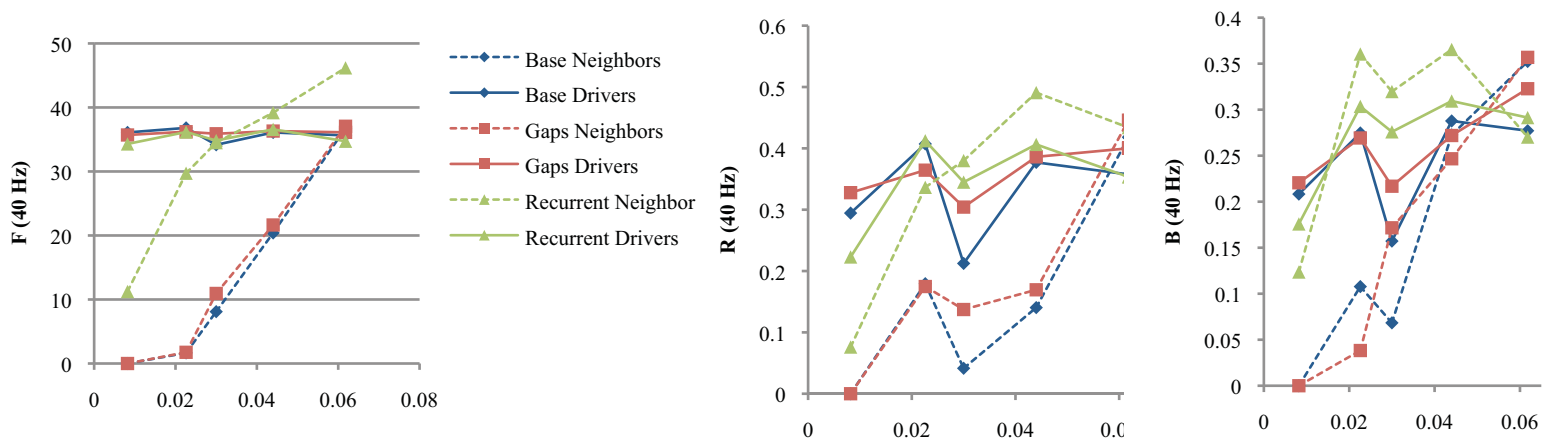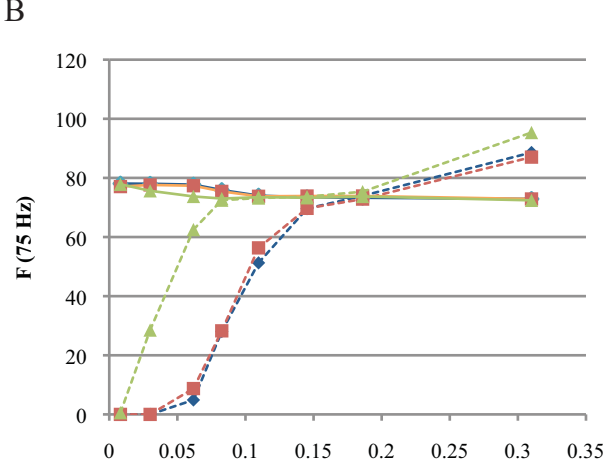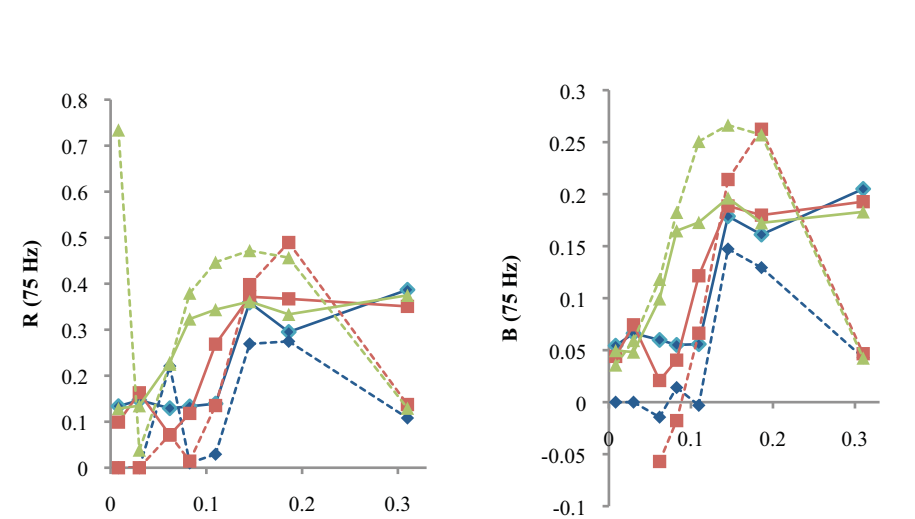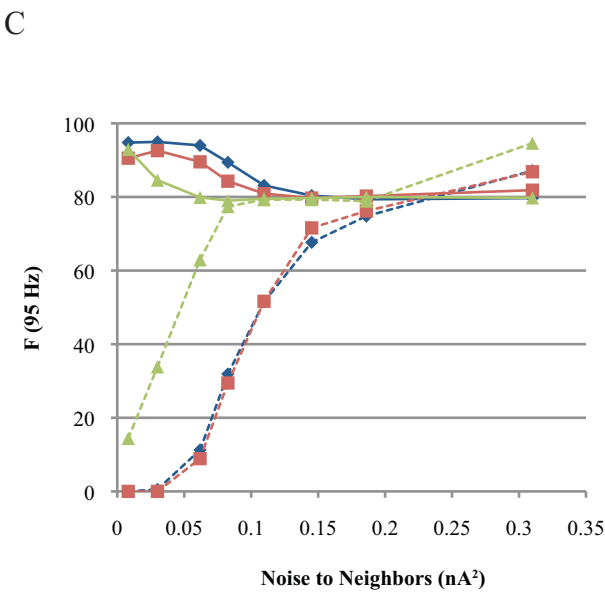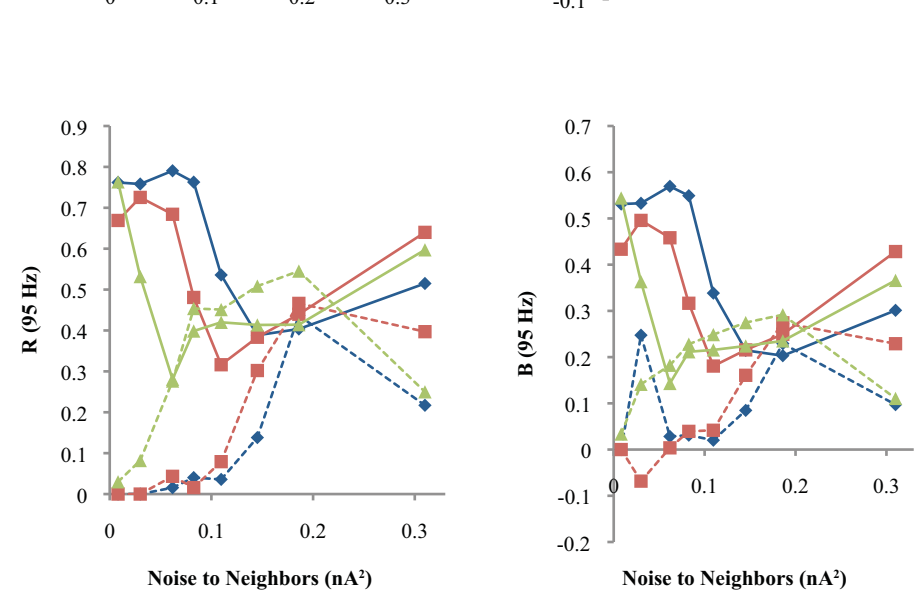

Supplement: supp_00643.2010_figS4.pdf [file supp_00643.2010_figS4.pdf]

# Supplemental Figure 5B

I

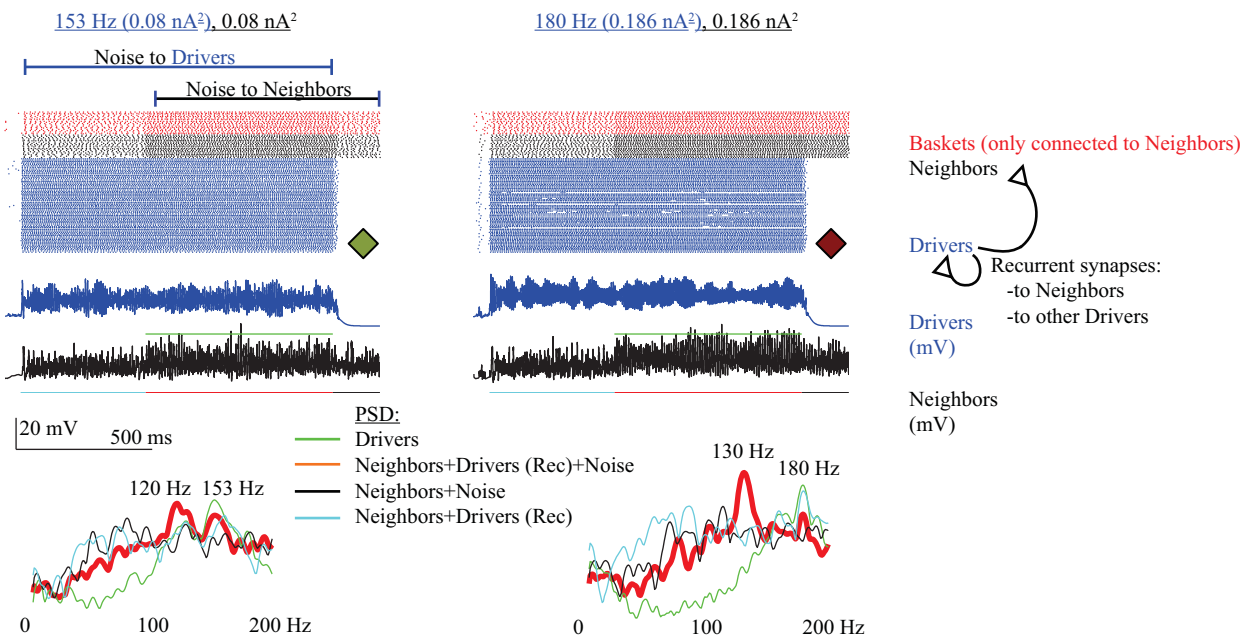

II

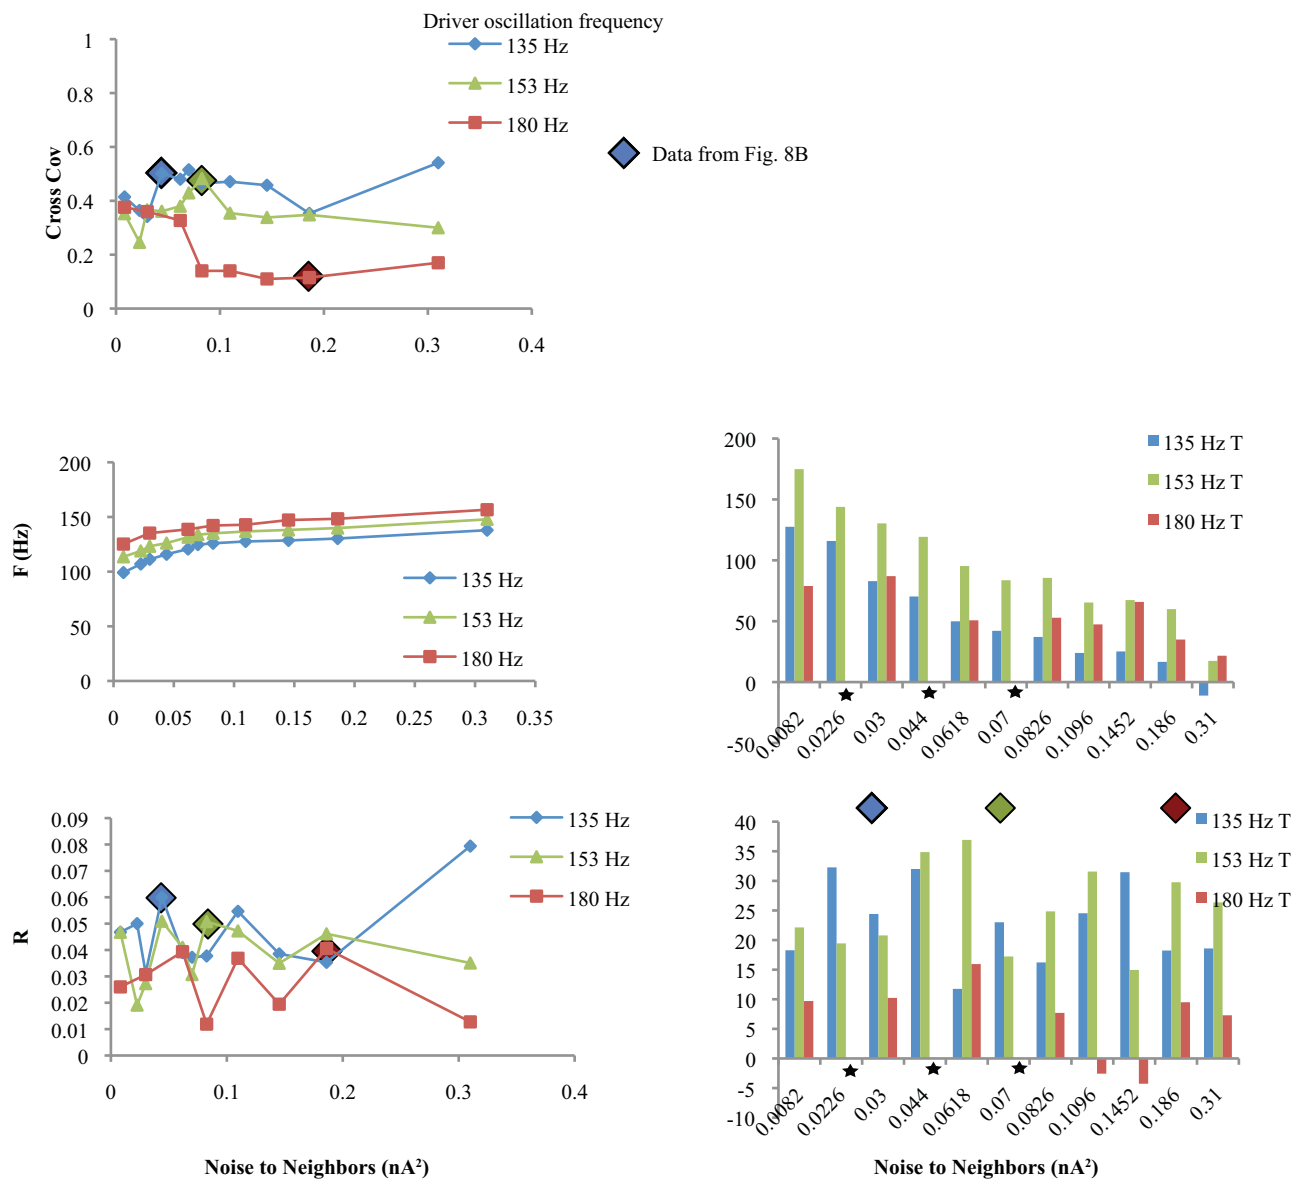

Supplement: supp_00643.2010_figS5b.pdf [file supp_00643.2010_figS5b.pdf]

# Supplemental Figure 5C

I

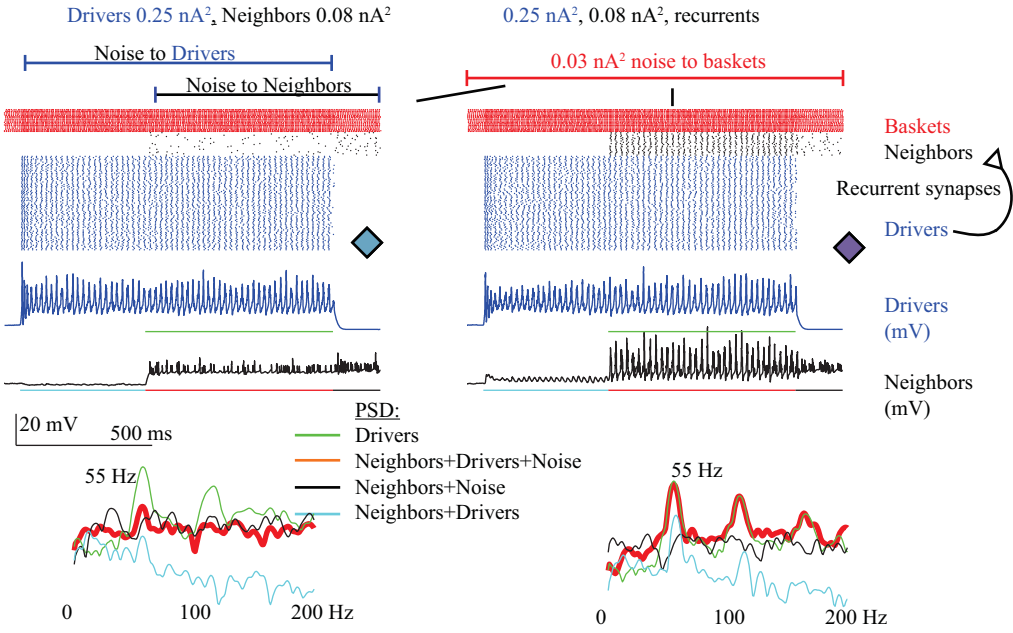

II

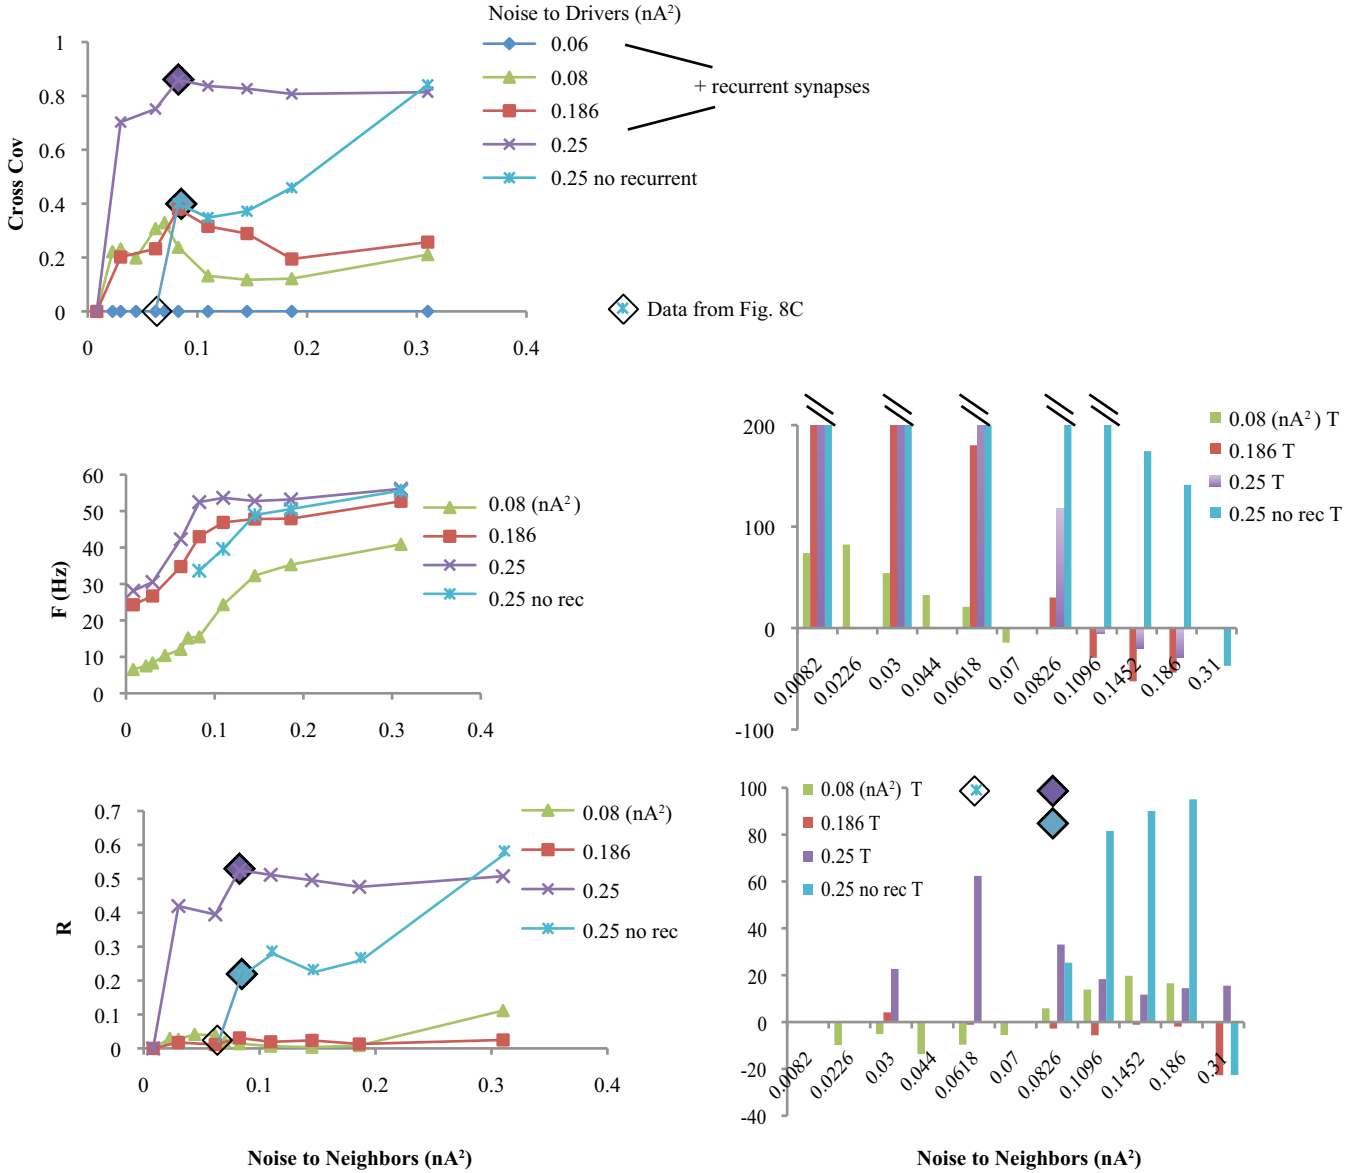

Supplement: supp_00643.2010_figS5c.pdf [file supp_00643.2010_figS5c.pdf]
